# Supplementary material for: Inference of Distant Genetic Relations in Humans Using “1000 Genomes”
Source: PubMed Central journal article supplement — Genome Biol Evol. 2015 Jan 7;7(2):481–92. doi: 10.1093/gbe/evv003 (PMC4350174; doi:10.1093/gbe/evv003), 2015-01-07
Supplement: supp_evv003_Supplimentary_FigS1.pdf [file supp_evv003_Supplimentary_FigS1.pdf]

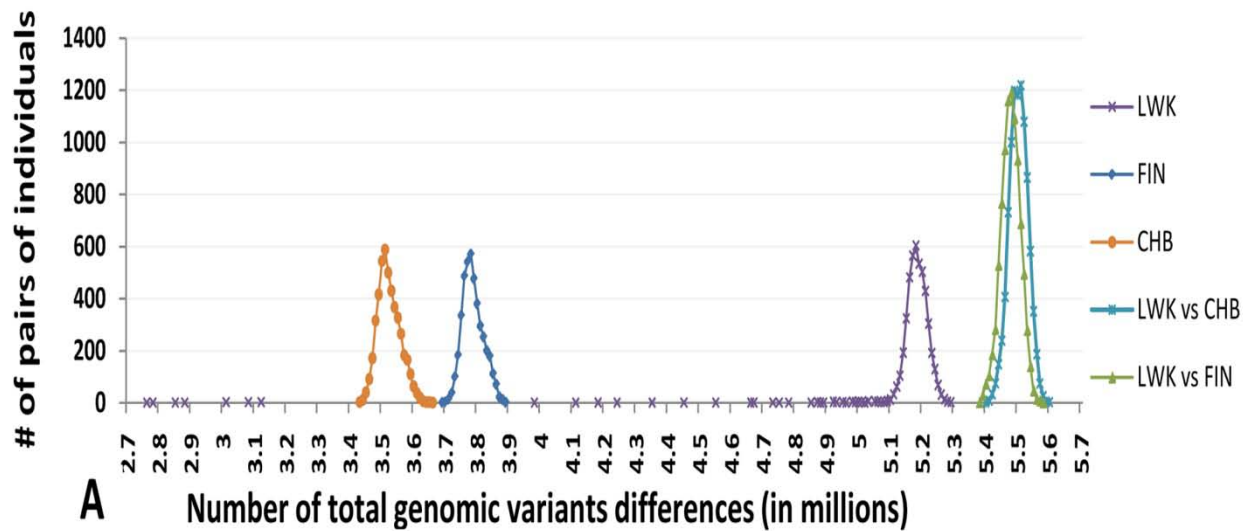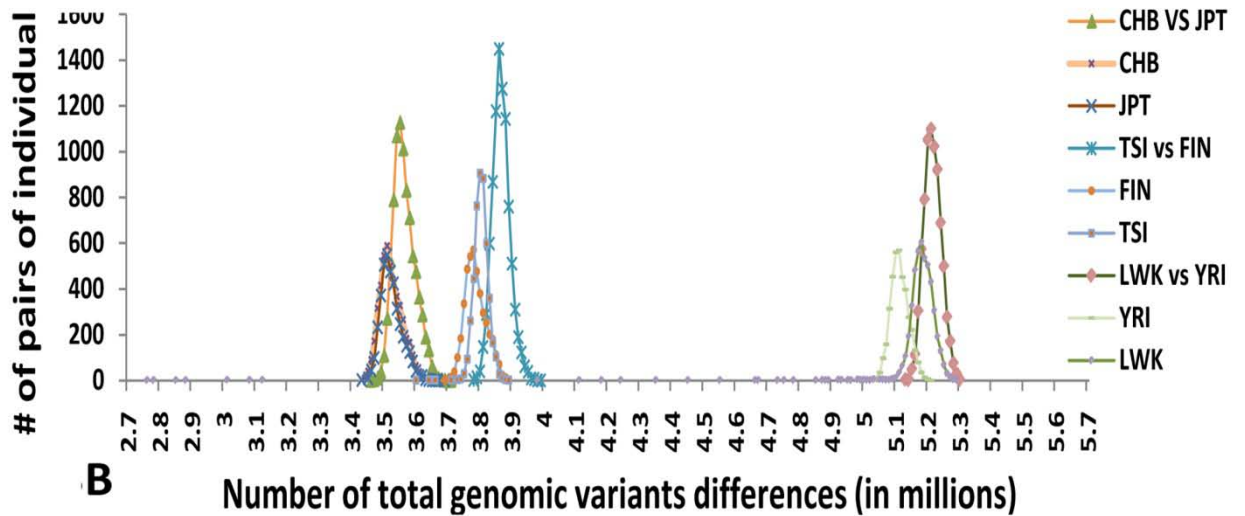

**Supplementary Figure S1. Inter-population distributions of the total number of genomic differences in humans.** The graphs reveal the fact that populations of the same continental ancestors share more genetic differences in common than the populations from different continental ancestors.

**A** - The total number of genomic differences between pairs of individuals who belong to different continental ancestors e.g. (African "LWK" vs European "FIN") and (African "LWK" vs Asian "CHB"). The two distributions to the far right of the graph show the amount of genomic variability between pairs of different continental ancestors.

**B** - The total number of genomic differences between individuals of the same continental ancestor. e.g. (Asians "CHB" vs "JPT") , (Europeans "TSI" vs "FIN") and (Africans "LWK" vs "YRI").
