# Supplementary material for: Inference of Distant Genetic Relations in Humans Using “1000 Genomes”
Source: PubMed Central journal article supplement — Genome Biol Evol. 2015 Jan 7;7(2):481–92. doi: 10.1093/gbe/evv003 (PMC4350174; doi:10.1093/gbe/evv003), 2015-01-07
Supplement: supp_evv003_SupplimentaryTableS3new.pdf [file supp_evv003_SupplimentaryTableS3new.pdf]

| Pairs of individuals sharing more than 1000 vrGVs |         |                  |              |
|---------------------------------------------------|---------|------------------|--------------|
| CHS                                               |         |                  |              |
| Ind1                                              | Ind2    | Shared Rare SNPs | Relationship |
| HG00463                                           | HG00478 | 1104             | undeclared   |
| HG00672                                           | HG00698 | 1501             | undeclared   |
| HG00475                                           | HG00500 | 1503             | undeclared   |
| HG00689                                           | HG00708 | 2188             | undeclared   |
| HG00581                                           | HG00607 | 3087             | undeclared   |
| HG00607                                           | HG00635 | 3124             | undeclared   |
| HG00584                                           | HG00595 | 3537             | undeclared   |
| HG00577                                           | HG00595 | 3547             | undeclared   |
| HG00578                                           | HG00607 | 3834             | undeclared   |
| HG00475                                           | HG00542 | 5671             | undeclared   |
| HG00418                                           | HG00427 | 8888             | Second Order |
| HG00581                                           | HG00635 | 14257            | Siblings     |
| HG00501                                           | HG00512 | 15249            | Siblings     |
| HG00578                                           | HG00635 | 16284            | Siblings     |
| HG00501                                           | HG00524 | 16566            | Siblings     |
| HG00512                                           | HG00524 | 16978            | Siblings     |
| HG00578                                           | HG00581 | 17501            | Siblings     |
| HG00577                                           | HG00584 | 18637            | Siblings     |
| HG00657                                           | HG00702 | 19344            | Maternal     |
| HG00656                                           | HG00702 | 20092            | Paternal     |
| TSI                                               |         |                  |              |
| Ind1                                              | Ind2    | Shared Rare SNPs | Relationship |
| NA20531                                           | NA20770 | 1469             | undeclared   |
| NA20516                                           | NA20816 | 1959             | undeclared   |
| NA20786                                           | NA20811 | 1964             | undeclared   |
| CEU                                               |         |                  |              |
| Ind1                                              | Ind2    | Shared Rare SNPs | Relationship |
| NA11931                                           | NA11933 | 1276             | undeclared   |
| NA11932                                           | NA12383 | 1892             | undeclared   |
| GBR                                               |         |                  |              |
| Ind1                                              | Ind2    | Shared Rare SNPs | Relationship |
| HG00112                                           | HG00123 | 2141             | undeclared   |
| HG00134                                           | HG00142 | 2849             | undeclared   |
| HG00116                                           | HG00120 | 3687             | undeclared   |

| HG00238     | HG00240     | 3950                    | undeclared          |
|-------------|-------------|-------------------------|---------------------|
| HG00119     | HG00124     | 6324                    | Second Order        |
|             |             |                         |                     |
| <b>LWK</b>  |             |                         |                     |
| <b>Ind1</b> | <b>Ind2</b> | <b>Shared Rare SNPs</b> | <b>Relationship</b> |
| NA19446     | NA19351     | 1000                    | undeclared          |
| NA19466     | NA19327     | 1002                    | undeclared          |
| NA19321     | NA19035     | 1002                    | undeclared          |
| NA19398     | NA19355     | 1002                    | undeclared          |
| NA19446     | NA19384     | 1003                    | undeclared          |
| NA19468     | NA19346     | 1003                    | undeclared          |
| NA19463     | NA19316     | 1004                    | undeclared          |
| NA19446     | NA19324     | 1004                    | undeclared          |
| NA19360     | NA19307     | 1006                    | undeclared          |
| NA19457     | NA19449     | 1009                    | undeclared          |
| NA19439     | NA19338     | 1012                    | undeclared          |
| NA19468     | NA19446     | 1012                    | undeclared          |
| NA19455     | NA19449     | 1014                    | undeclared          |
| NA19456     | NA19311     | 1017                    | undeclared          |
| NA19456     | NA19449     | 1017                    | undeclared          |
| NA19455     | NA19377     | 1017                    | undeclared          |
| NA19379     | NA19377     | 1017                    | undeclared          |
| NA19430     | NA19319     | 1017                    | undeclared          |
| NA19446     | NA19429     | 1021                    | undeclared          |
| NA19456     | NA19359     | 1021                    | undeclared          |
| NA19439     | NA19379     | 1022                    | undeclared          |
| NA19437     | NA19404     | 1023                    | undeclared          |
| NA19468     | NA19456     | 1023                    | undeclared          |
| NA19468     | NA19440     | 1024                    | undeclared          |
| NA19466     | NA19398     | 1025                    | undeclared          |
| NA19351     | NA19308     | 1027                    | undeclared          |
| NA19436     | NA19338     | 1030                    | undeclared          |
| NA19439     | NA19318     | 1030                    | undeclared          |
| NA19439     | NA19404     | 1030                    | undeclared          |
| NA19474     | NA19473     | 1034                    | undeclared          |
| NA19472     | NA19311     | 1035                    | undeclared          |
| NA19444     | NA19338     | 1035                    | undeclared          |
| NA19439     | NA19438     | 1037                    | undeclared          |
| NA19466     | NA19355     | 1038                    | undeclared          |
| NA19456     | NA19394     | 1039                    | undeclared          |
| NA19403     | NA19311     | 1039                    | undeclared          |

|         |         |      |            |
|---------|---------|------|------------|
| NA19376 | NA19311 | 1042 | undeclared |
| NA19338 | NA19327 | 1042 | undeclared |
| NA19436 | NA19316 | 1042 | undeclared |
| NA19466 | NA19384 | 1043 | undeclared |
| NA19381 | NA19379 | 1043 | undeclared |
| NA19461 | NA19403 | 1049 | undeclared |
| NA19436 | NA19404 | 1050 | undeclared |
| NA19463 | NA19404 | 1051 | undeclared |
| NA19351 | NA19044 | 1056 | undeclared |
| NA19446 | NA19390 | 1061 | undeclared |
| NA19466 | NA19435 | 1063 | undeclared |
| NA19379 | NA19311 | 1063 | undeclared |
| NA19436 | NA19377 | 1065 | undeclared |
| NA19456 | NA19028 | 1067 | undeclared |
| NA19471 | NA19436 | 1068 | undeclared |
| NA19439 | NA19428 | 1068 | undeclared |
| NA19449 | NA19371 | 1071 | undeclared |
| NA19456 | NA19327 | 1072 | undeclared |
| NA19437 | NA19327 | 1074 | undeclared |
| NA19444 | NA19316 | 1077 | undeclared |
| NA19350 | NA19046 | 1077 | undeclared |
| NA19434 | NA19338 | 1077 | undeclared |
| NA19436 | NA19332 | 1078 | undeclared |
| NA19457 | NA19338 | 1081 | undeclared |
| NA19452 | NA19448 | 1084 | undeclared |
| NA19394 | NA19384 | 1089 | undeclared |
| NA19461 | NA19332 | 1093 | undeclared |
| NA19391 | NA19390 | 1094 | undeclared |
| NA19434 | NA19307 | 1095 | undeclared |
| NA19384 | NA19350 | 1095 | undeclared |
| NA19430 | NA19376 | 1096 | undeclared |
| NA19448 | NA19390 | 1097 | undeclared |
| NA19439 | NA19324 | 1097 | undeclared |
| NA19463 | NA19461 | 1101 | undeclared |
| NA19466 | NA19449 | 1106 | undeclared |
| NA19436 | NA19390 | 1107 | undeclared |
| NA19473 | NA19466 | 1107 | undeclared |
| NA19351 | NA19038 | 1110 | undeclared |
| NA19041 | NA19035 | 1112 | undeclared |
| NA19455 | NA19439 | 1113 | undeclared |
| NA19449 | NA19346 | 1116 | undeclared |
| NA19439 | NA19437 | 1122 | undeclared |
| NA19456 | NA19436 | 1123 | undeclared |

|         |         |      |            |
|---------|---------|------|------------|
| NA19394 | NA19315 | 1123 | undeclared |
| NA19440 | NA19436 | 1125 | undeclared |
| NA19346 | NA19318 | 1131 | undeclared |
| NA19403 | NA19394 | 1132 | undeclared |
| NA19456 | NA19346 | 1132 | undeclared |
| NA19437 | NA19431 | 1132 | undeclared |
| NA19449 | NA19359 | 1133 | undeclared |
| NA19436 | NA19384 | 1134 | undeclared |
| NA19041 | NA19028 | 1134 | undeclared |
| NA19310 | NA19035 | 1136 | undeclared |
| NA19384 | NA19332 | 1138 | undeclared |
| NA19466 | NA19346 | 1138 | undeclared |
| NA19446 | NA19440 | 1138 | undeclared |
| NA19473 | NA19471 | 1141 | undeclared |
| NA19404 | NA19391 | 1142 | undeclared |
| NA19384 | NA19318 | 1142 | undeclared |
| NA19467 | NA19436 | 1159 | undeclared |
| NA19461 | NA19436 | 1161 | undeclared |
| NA19350 | NA19332 | 1164 | undeclared |
| NA19468 | NA19437 | 1167 | undeclared |
| NA19466 | NA19350 | 1167 | undeclared |
| NA19446 | NA19439 | 1170 | undeclared |
| NA19437 | NA19384 | 1179 | undeclared |
| NA19434 | NA19316 | 1188 | undeclared |
| NA19468 | NA19403 | 1188 | undeclared |
| NA19473 | NA19318 | 1189 | undeclared |
| NA19456 | NA19429 | 1199 | undeclared |
| NA19403 | NA19384 | 1199 | undeclared |
| NA19473 | NA19436 | 1201 | undeclared |
| NA19468 | NA19316 | 1202 | undeclared |
| NA19431 | NA19332 | 1206 | undeclared |
| NA19452 | NA19346 | 1206 | undeclared |
| NA19474 | NA19327 | 1206 | undeclared |
| NA19461 | NA19439 | 1207 | undeclared |
| NA19466 | NA19446 | 1212 | undeclared |
| NA19394 | NA19383 | 1217 | undeclared |
| NA19355 | NA19316 | 1232 | undeclared |
| NA19468 | NA19390 | 1233 | undeclared |
| NA19466 | NA19395 | 1233 | undeclared |
| NA19380 | NA19328 | 1235 | undeclared |
| NA19431 | NA19379 | 1240 | undeclared |
| NA19456 | NA19403 | 1246 | undeclared |
| NA19468 | NA19435 | 1246 | undeclared |

|         |         |      |            |
|---------|---------|------|------------|
| NA19360 | NA19334 | 1252 | undeclared |
| NA19393 | NA19046 | 1254 | undeclared |
| NA19467 | NA19316 | 1262 | undeclared |
| NA19461 | NA19316 | 1276 | undeclared |
| NA19384 | NA19346 | 1286 | undeclared |
| NA19436 | NA19429 | 1305 | undeclared |
| NA19466 | NA19391 | 1313 | undeclared |
| NA19436 | NA19383 | 1317 | undeclared |
| NA19437 | NA19436 | 1321 | undeclared |
| NA19439 | NA19436 | 1328 | undeclared |
| NA19466 | NA19436 | 1358 | undeclared |
| NA19431 | NA19324 | 1367 | undeclared |
| NA19309 | NA19035 | 1375 | undeclared |
| NA19430 | NA19384 | 1375 | undeclared |
| NA19439 | NA19384 | 1388 | undeclared |
| NA19468 | NA19384 | 1396 | undeclared |
| NA19439 | NA19394 | 1399 | undeclared |
| NA19463 | NA19437 | 1399 | undeclared |
| NA19474 | NA19455 | 1404 | undeclared |
| NA19467 | NA19035 | 1423 | undeclared |
| NA19456 | NA19384 | 1464 | undeclared |
| NA19436 | NA19346 | 1479 | undeclared |
| NA19429 | NA19346 | 1480 | undeclared |
| NA19338 | NA19311 | 1481 | undeclared |
| NA19439 | NA19359 | 1481 | undeclared |
| NA19468 | NA19436 | 1488 | undeclared |
| NA19473 | NA19461 | 1527 | undeclared |
| NA19449 | NA19398 | 1536 | undeclared |
| NA19448 | NA19384 | 1548 | undeclared |
| NA19360 | NA19332 | 1561 | undeclared |
| NA19436 | NA19431 | 1568 | undeclared |
| NA19451 | NA19448 | 1608 | undeclared |
| NA19467 | NA19318 | 1734 | undeclared |
| NA19461 | NA19452 | 1751 | undeclared |
| NA19347 | NA19317 | 1780 | undeclared |
| NA19466 | NA19439 | 1784 | undeclared |
| NA19352 | NA19317 | 1792 | undeclared |
| NA19468 | NA19431 | 1850 | undeclared |
| NA19437 | NA19394 | 1876 | undeclared |
| NA19360 | NA19331 | 1884 | undeclared |
| NA19467 | NA19461 | 1900 | undeclared |
| NA19321 | NA19307 | 1900 | undeclared |
| NA19456 | NA19404 | 1954 | undeclared |

|         |         |      |            |
|---------|---------|------|------------|
| NA19446 | NA19383 | 1961 | undeclared |
| NA19455 | NA19452 | 1972 | undeclared |
| NA19467 | NA19384 | 1986 | undeclared |
| NA19321 | NA19046 | 1998 | undeclared |
| NA19468 | NA19466 | 2054 | undeclared |
| NA19318 | NA19317 | 2085 | undeclared |
| NA19439 | NA19403 | 2093 | undeclared |
| NA19380 | NA19379 | 2117 | undeclared |
| NA19395 | NA19359 | 2173 | undeclared |
| NA19456 | NA19428 | 2183 | undeclared |
| NA19444 | NA19360 | 2223 | undeclared |
| NA19316 | NA19307 | 2395 | undeclared |
| NA19308 | NA19035 | 2411 | undeclared |
| NA19347 | NA19318 | 2412 | undeclared |
| NA19393 | NA19376 | 2491 | undeclared |
| NA19316 | NA19312 | 2496 | undeclared |
| NA19352 | NA19318 | 2576 | undeclared |
| NA19397 | NA19046 | 2581 | undeclared |
| NA19376 | NA19350 | 2586 | undeclared |
| NA19359 | NA19346 | 2600 | undeclared |
| NA19393 | NA19375 | 2673 | undeclared |
| NA19382 | NA19379 | 2761 | undeclared |
| NA19452 | NA19430 | 2780 | undeclared |
| NA19396 | NA19375 | 2872 | undeclared |
| NA19471 | NA19466 | 2959 | undeclared |
| NA19307 | NA19046 | 2990 | undeclared |
| NA19376 | NA19044 | 3084 | undeclared |
| NA19467 | NA19466 | 3102 | undeclared |
| NA19471 | NA19318 | 3109 | undeclared |
| NA19380 | NA19044 | 3111 | undeclared |
| NA19375 | NA19350 | 3298 | undeclared |
| NA19434 | NA19360 | 3375 | undeclared |
| NA19376 | NA19046 | 3458 | undeclared |
| NA19376 | NA19318 | 3581 | undeclared |
| NA19359 | NA19318 | 3586 | undeclared |
| NA19451 | NA19430 | 3628 | undeclared |
| NA19397 | NA19375 | 3810 | undeclared |
| NA19396 | NA19376 | 3866 | undeclared |
| NA19396 | NA19046 | 3918 | undeclared |
| NA19350 | NA19311 | 3953 | undeclared |
| NA19376 | NA19352 | 4079 | undeclared |
| NA19385 | NA19028 | 4115 | undeclared |
| NA19396 | NA19350 | 4175 | undeclared |

|             |             |                         |                     |
|-------------|-------------|-------------------------|---------------------|
| NA19397     | NA19376     | 4645                    | undeclared          |
| NA19436     | NA19375     | 4646                    | undeclared          |
| NA19376     | NA19317     | 5125                    | undeclared          |
| NA19461     | NA19428     | 5220                    | undeclared          |
| NA19375     | NA19046     | 5610                    | undeclared          |
| NA19397     | NA19350     | 5794                    | undeclared          |
| NA19376     | NA19375     | 5875                    | undeclared          |
| NA19376     | NA19347     | 6710                    | undeclared          |
| NA19395     | NA19346     | 7660                    | undeclared          |
| NA19434     | NA19355     | 7822                    | undeclared          |
| NA19452     | NA19451     | 8272                    | undeclared          |
| NA19444     | NA19355     | 8955                    | undeclared          |
| NA19312     | NA19307     | 10654                   | undeclared          |
| NA19359     | NA19309     | 11612                   | undeclared          |
| NA19381     | NA19380     | 11962                   | undeclared          |
| NA19453     | NA19434     | 12910                   | second order        |
| NA19469     | NA19443     | 13252                   | second order        |
| NA19334     | NA19313     | 13649                   | second order        |
| NA19453     | NA19444     | 18147                   | second order        |
| NA19382     | NA19380     | 21720                   | second order        |
| NA19331     | NA19313     | 30774                   | paternal            |
| NA19470     | NA19469     | 30913                   | maternal            |
| NA19453     | NA19445     | 31161                   | paternal            |
| NA19382     | NA19381     | 33394                   | paternal            |
| NA19334     | NA19331     | 34036                   | Third order         |
| NA19444     | NA19434     | 35352                   | siblings            |
| NA19397     | NA19396     | 38092                   | siblings            |
| NA19470     | NA19443     | 38302                   | Siblings            |
| NA19352     | NA19347     | 38608                   | Siblings            |
| NA19374     | NA19373     | 46745                   | Siblings            |
| <b>ASW</b>  |             |                         |                     |
| <b>Ind1</b> | <b>Ind2</b> | <b>Shared Rare SNPs</b> | <b>Relationship</b> |
| NA19703     | NA19711     | 1085                    | undeclared          |
| NA19713     | NA19904     | 1130                    | undeclared          |
| NA19704     | NA20291     | 1334                    | undeclared          |
| NA19711     | NA19904     | 1642                    | undeclared          |
| NA20281     | NA20282     | 1908                    | undeclared          |
| NA19701     | NA19704     | 2264                    | undeclared          |
| NA19707     | NA19985     | 2282                    | undeclared          |
| NA19707     | NA19713     | 2533                    | undeclared          |
| NA19703     | NA19904     | 2662                    | undeclared          |

|             |             |                         |                             |
|-------------|-------------|-------------------------|-----------------------------|
| NA20296     | NA20317     | 3000                    | undeclared                  |
| NA20340     | NA20346     | 4647                    | undeclared                  |
| NA19834     | NA19920     | 4814                    | undeclared                  |
| NA20344     | NA20346     | 4860                    | undeclared                  |
| NA20344     | NA20351     | 5987                    | undeclared                  |
| NA20340     | NA20344     | 6138                    | undeclared                  |
| NA19625     | NA20414     | 8903                    | Second Order (Mother-Child) |
| NA20359     | NA20363     | 16266                   | Second Order (Mother)       |
| NA19713     | NA19985     | 27755                   | Sibling (Mother)            |
| NA20334     | NA20336     | 28968                   | Sibling(Mother)             |
| NA20289     | NA20341     | 32563                   | Sibling (Mother)            |
|             |             |                         |                             |
| <b>YRI</b>  |             |                         |                             |
| <b>Ind1</b> | <b>Ind2</b> | <b>Shared Rare SNPs</b> | <b>Relationship</b>         |
| NA18504     | NA18505     | 1193                    | undeclared                  |
| NA18923     | NA19257     | 1841                    | undeclared                  |
|             |             |                         |                             |
| <b>MXL</b>  |             |                         |                             |
| <b>Ind1</b> | <b>Ind2</b> | <b>Shared Rare SNPs</b> | <b>Relationship</b>         |
| NA19685     | NA19752     | 1503                    | undeclared                  |
| NA19657     | NA19785     | 1625                    | undeclared                  |
| NA19664     | NA19685     | 2759                    | undeclared                  |
| NA19753     | NA19786     | 2763                    | undeclared                  |
| NA19661     | NA19752     | 2918                    | undeclared                  |
| NA19657     | NA19786     | 3525                    | undeclared                  |
| NA19660     | NA19664     | 5312                    | undeclared                  |
| NA19657     | NA19753     | 6252                    | Second order                |
| NA19664     | NA19672     | 6282                    | Second order                |
| NA19672     | NA19685     | 6509                    | Second order                |
| NA19726     | NA19738     | 6731                    | Second order                |
| NA19660     | NA19672     | 12889                   | Siblings                    |
| NA19660     | NA19685     | 13029                   | Maternal                    |
| NA19675     | NA19678     | 15331                   | Maternal                    |
| NA19675     | NA19679     | 15863                   | Paternal                    |
| NA19661     | NA19685     | 17805                   | Paternal                    |
|             |             |                         |                             |
| <b>CLM</b>  |             |                         |                             |
| <b>Ind1</b> | <b>Ind2</b> | <b>Shared Rare SNPs</b> | <b>Relationship</b>         |
| HG01497     | HG01498     | 1150                    | undeclared                  |
| HG01383     | HG01465     | 1265                    | undeclared                  |
| HG01354     | HG01489     | 2148                    | undeclared                  |
| HG01277     | HG01278     | 2863                    | Wife and Husband            |



| PUR     |         |                  |              |
|---------|---------|------------------|--------------|
| Ind1    | Ind2    | Shared Rare SNPs | Relationship |
| HG01061 | HG01070 | 1089             | undeclared   |
